# Supplementary material for: Surgery and COVID-19: a rapid scoping review of the impact of the first wave of COVID-19 on surgical services
Source: PubMed Central journal article supplement — BMJ Open. 2021 Jun 15;11(6):e043966. doi: 10.1136/bmjopen-2020-043966 (PMC8210688; doi:10.1136/bmjopen-2020-043966), 2021-06-15
Supplement: bmjopen-2020-043966supp001.pdf [file bmjopen-2020-043966supp001.pdf]

## Appendix A. Search Strategy

### Database: Ovid MEDLINE (R) and Epub Ahead of Print, In-Process & Other Non-Indexed Citations and Daily <1946 to May 08, 2020>

#### Search Strategy:

- 
- 1 exp Disease Outbreaks/ (96117)
  - 2 (pandemic\* or epidemic\* or outbreak\* or out break\*).mp. (230774)
  - 3 1 or 2 (231940)
  - 4 exp Coronavirus (13456)
  - 5 coronavirus infections/ or severe acute respiratory syndrome/ (11068)
  - 6 Coronaviridae Infections/ (900)
  - 7 coronaviridae/ or coronavirus/ (3916)
  - 8 Influenza a virus, h1n1 subtype/ or Influenza a virus, h3n2 subtype/ or influenza a virus, h5n1 subtype/ (22141)
  - 9 Hemorrhagic Fever, Ebola/ (5316)
  - 10 SARS Virus/ (3038)
  - 11 Middle East Respiratory Syndrome Coronavirus/ (1034)
  - 12 (pneumonia.mp. or exp pneumonia/) and Wuhan.mp. (661)
  - 13 (coronavir\* or COVID-19 or SARS-related coronavirus or SARS-CoV-2 or 2019 novel coronavirus or 2019-nCoV or nCoV or h1n1 or h3n2 or h5n1 or avian influenza or avian flu or swine influenza or swine flu or SARS or ebola\* or middle east respiratory syndrome or MERS).mp. (77950)
  - 14 (wuhan) adj2 (coronavir\* or flu or pneumonia\* or COVID-19 or 2019-nCoV).mp. (190)
  - 15 (coronavir\*) adj2 (infection\*).mp. (8441)
  - 16 4 or 5 or 6 or 7 or 8 or 9 or 10 or 11 or 12 or 13 or 14 or 15 (79915)
  - 17 General Surgery/ (38626)
  - 18 Orthopedic Procedures/ (25371)
  - 19 Traumatology/ (3474)
  - 20 Neurosurgery/ (14892)
  - 21 Obstetrics/ (22533)
  - 22 Anesthesia/ (62587)
  - 23 surgical procedures, operative/ or exp elective surgical procedures/ (68085)
  - 24 exp Arthroplasty, Replacement/ (54362)
  - 25 (general surgery or orthopaedic or orthopedic or trauma or neurosurgery or obstetrics or anesthesia or anaesthesia).mp. (748651)
  - 26 (surger\* or operation\* or procedure\*).mp. (3638036)
  - 27 ((elective or non-urgent) adj2 (surg\* or procedure\*)).mp. (31794)
  - 28 (surg\* adj2 (procedure\* or planning or triage or operation\* or resource\* or backlog or re-organiz\* or postpone\* or cancel\* or capacit\* or wait time\*)).mp. (444474)
  - 29 ((clinic\* or hospital) adj2 (process\* or procedure\* or triage or planning or performance\* or capacit\*)).mp. (69185)
  - 30 17 or 18 or 19 or 20 or 21 or 22 or 23 or 24 or 25 or 26 or 27 or 28 or 29 (4101483)
  - 31 3 and 16 and 30 (2075)
- .....

**Database: EMBASE <1974 to 2020 May 08>****Search Strategy:**

- 
- 1 exp epidemic/ (103292)
  - 2 exp pandemic/ (12990)
  - 3 1 or 2 (114458)
  - 4 pandemic influenza/ (4748)
  - 5 exp severe acute respiratory syndrome/ (8505)
  - 6 exp coronaviridae/ or coronaviridae infection/ (14928)
  - 7 coronavirinae/ (2093)
  - 8 Coronavirus infection/ (3397)
  - 9 avian influenza virus/ or “influenza a virus (h1n1)”/ or “influenza a virus (h3n2)”/, “influenza a virus (h5n1)”/ (7466)
  - 10 Ebola hemorrhagic fever/ (5712)
  - 11 exp SARS coronavirus/ (5823)
  - 12 Middle East respiratory syndrome/ (935)
  - 13 (pneumonia.mp. or exp pneumonia/) and Wuhan.mp. (512)
  - 14 (coronavir\* or COVID-19 or SARS-related coronavirus or SARS-CoV-2 or 2019 novel coronavirus or 2019-nCoV or nCoV).mp. (92353)
  - 15 (wuhan adj2 (coronavir\* or flu or pneumonia\* or COVID-19 or 2019-nCoV)).mp. (161)
  - 16 (coronavir\* adj2 infection\*).mp. (4793)
  - 17 4 or 5 or 6 or 7 or 8 or 9 or 10 or 11 or 12 or 13 or 14 or 15 or 16 (96712)
  - 18 general surgery/ (15070)
  - 19 orthopedic surgery/ (32672)
  - 20 traumatology/ (10653)
  - 21 neurosurgery/ (59847)
  - 22 obstetrics/ (34886)
  - 23 anesthesiological procedure/ (1785)
  - 24 elective surgery/ (34038)
  - 25 replacement arthroplasty/ or exp arthroplasty/ (73583)
  - 26 (general surgery or orthopaedic or orthopedic or trauma or neurosurgery or obstetrics or anaesthesia or anesthesia).mp. (966732)
  - 27 (surger\* or operation\* or procedure\*).mp. (5402047)
  - 28 ((elective or non-urgent adj2 (surg\* or procedure\*)).mp. (52808)
  - 29 (surg\* adj2 (procedure\* or planning or triag\* or operation\* or resource\* or backlog or re-organiz\* or postpon\* or cancel\* or capac\* or wait time\*)).mp. (187480)
  - 30 ((clinic\* or hospital) adj2 (process\* or procedure\* or triag\* or planning or performance\* or capac\*)).mp. (83715)
  - 31 18 or 19 or 20 or 21 or 22 or 23 or 24 or 25 or 26 or 27 or 28 or 29 or 30 (5948860)
  - 32 3 and 17 and 31 (1844)
- .....

| <b>Database</b> | <b>Pandemic terms</b><br>Pandemic,<br>epidemic                                                      | <b>Disease terms</b><br>COVID-19, SARS,<br>MERS, pandemic flu<br>(h1n1, h3n2, h5n1), ebola                                                                                                                                                                                                                                                                                                                                                                                                                                                                                                                                                                                                                                                                             | <b>Surgical terms</b><br>Non-urgent/elective<br>surgery (general,<br>orthopedic, anesthesia,<br>trauma, neurosurgery,<br>obstetrics)                                                                                                                                                                                                                                                                                                                                                                                                                                                                                                                                                                                                      |
|-----------------|-----------------------------------------------------------------------------------------------------|------------------------------------------------------------------------------------------------------------------------------------------------------------------------------------------------------------------------------------------------------------------------------------------------------------------------------------------------------------------------------------------------------------------------------------------------------------------------------------------------------------------------------------------------------------------------------------------------------------------------------------------------------------------------------------------------------------------------------------------------------------------------|-------------------------------------------------------------------------------------------------------------------------------------------------------------------------------------------------------------------------------------------------------------------------------------------------------------------------------------------------------------------------------------------------------------------------------------------------------------------------------------------------------------------------------------------------------------------------------------------------------------------------------------------------------------------------------------------------------------------------------------------|
| <b>MEDLINE</b>  | exp Disease<br>Outbreaks/<br>OR<br>(pandemic* or<br>epidemic* or<br>outbreak* or out<br>break*).mp. | exp Coronavirus<br>OR<br>coronavirus infections/ or<br>severe acute respiratory<br>syndrome/<br>OR<br>Coronaviridae Infections/<br>OR<br>coronaviridae/ or<br>coronavirus/<br>OR<br>Influenza a virus, h1n1<br>subtype/ or Influenza a<br>virus, h3n2 subtype/ or<br>influenza a virus, h5n1<br>subtype/<br>OR<br>Hemorrhagic Fever,<br>Ebola/<br>OR<br>SARS Virus/<br>OR<br>Middle East Respiratory<br>Syndrome Coronavirus/<br>OR<br>(pneumonia.mp. or exp<br>pneumonia/) and<br>Wuhan.mp.<br>OR<br>(coronavir* or COVID-19<br>or SARS-related<br>coronavirus or SARS-<br>CoV-2 or 2019 novel<br>coronavirus or 2019-nCoV<br>or nCoV or h1n1 or h3n2<br>or h5n1 or avian influenza<br>or avian flu or swine<br>influenza or swine flu or<br>SARS or ebola* or middle | General Surgery/<br>OR<br>Orthopedic Procedures/<br>OR<br>Traumatology/<br>OR<br>Neurosurgery/<br>OR<br>Obstetrics/<br>OR<br>Anesthesia/<br>OR<br>surgical procedures,<br>operative/ or exp elective<br>surgical procedures/<br>OR<br>exp Arthroplasty,<br>Replacement/<br>OR<br>(general surgery or<br>orthopaedic or orthopedic<br>or trauma or neurosurgery<br>or obstetrics or anesthesia<br>or anaesthesia).mp.<br>OR<br>(surger* or operation* or<br>procedure*).mp.<br>OR<br>((elective or non-urgent)<br>adj2 (surg* or<br>procedure*)).mp.<br>OR<br>(surg* adj2 (procedure* or<br>planning or triage or<br>operation* or resource* or<br>backlog or re-organiz* or<br>postpone* or cancel* or<br>capacit* or wait<br>time*)).mp. |

|               |                                      |                                                                                                                                                                                                                                                                                                                                                                                                                                                                                                                                                                                                                          |                                                                                                                                                                                                                                                                                                                                                                                                                                                                                                                                                                                                                                       |
|---------------|--------------------------------------|--------------------------------------------------------------------------------------------------------------------------------------------------------------------------------------------------------------------------------------------------------------------------------------------------------------------------------------------------------------------------------------------------------------------------------------------------------------------------------------------------------------------------------------------------------------------------------------------------------------------------|---------------------------------------------------------------------------------------------------------------------------------------------------------------------------------------------------------------------------------------------------------------------------------------------------------------------------------------------------------------------------------------------------------------------------------------------------------------------------------------------------------------------------------------------------------------------------------------------------------------------------------------|
|               |                                      | east respiratory syndrome or MERS).mp.<br>OR<br>(wuhan) adj2 (coronavir* or flu or pneumonia* or COVID-19 or 2019-nCoV).mp.<br>OR<br>(coronavir*) adj2 (infection*).mp.                                                                                                                                                                                                                                                                                                                                                                                                                                                  | OR<br>((clinic* or hospital) adj2 (process* or procedure* or triage or planning or performance* or capacit*).mp.                                                                                                                                                                                                                                                                                                                                                                                                                                                                                                                      |
| <b>EMBASE</b> | exp epidemic/<br>OR<br>exp pandemic/ | pandemic influenza/<br>OR<br>exp severe acute respiratory syndrome/<br>OR<br>exp coronaviridae/ or coronaviridae infection/<br>OR<br>coronavirinae/<br>OR<br>Coronavirus infection/<br>OR<br>avian influenza virus/ or “influenza a virus (h1n1)”/ or “influenza a virus (h3n2)”/, “influenza a virus (h5n1)”/<br>OR<br>Ebola hemorrhagic fever/<br>OR<br>exp SARS coronavirus/<br>OR<br>Middle East respiratory syndrome/<br>OR<br>(pneumonia.mp. or exp pneumonia/) and Wuhan.mp.<br>OR<br>(coronavir* or COVID-19 or SARS-related coronavirus or SARS-CoV-2 or 2019 novel coronavirus or 2019-nCoV or nCoV).mp.<br>OR | general surgery/<br>OR<br>orthopedic surgery/<br>OR<br>traumatology/<br>OR<br>neurosurgery/<br>OR<br>obstetrics/<br>OR<br>anesthesiological procedure/<br>OR<br>elective surgery/<br>OR<br>replacement arthroplasty/ or exp arthroplasty/<br>OR<br>(general surgery or orthopaedic or orthopedic or trauma or neurosurgery or obstetrics or anaesthesia or anaesthesia).mp.<br>OR<br>(surger* or operation* or procedure*).mp.<br>OR<br>((elective or non-urgent adj2 (surg* or procedure*).mp.<br>OR<br>(surg* adj2 (procedure* or planning or triag* or operation* or resource* or backlog or re-organiz* or postpon* or cancel* or |

|  |  |                                                                                                                       |                                                                                                                                                 |
|--|--|-----------------------------------------------------------------------------------------------------------------------|-------------------------------------------------------------------------------------------------------------------------------------------------|
|  |  | (wuhan adj2 (coronavir* or flu or pneumonia* or COVID-19 or 2019-nCoV)).mp.<br>OR<br>(coronavir* adj2 infection*).mp. | capacit* or wait time*).mp.<br>OR<br>((clinic* or hospital) adj2 (process* or procedure* or triag* or planning or performance* or capacit*).mp. |
|--|--|-----------------------------------------------------------------------------------------------------------------------|-------------------------------------------------------------------------------------------------------------------------------------------------|

### GREY LITERATURE SEARCH PLAN

Developed in reference to Guide from the University of Toronto (Stapleton, Fuller & Lenton)

STEP 1) Targeted Website Browsing. Will be using any combination of standard terms “coronavirus” OR “Covid-19” OR “Surgery” OR “non-urgent surgery” OR “elective surgery” OR “guidelines”)

### NON-GOVERNMENT GROUPS

World Health Organization (<https://www.who.int>)

Center for Disease Control and Prevention (<https://www.cdc.gov>)

European Centre for Disease Prevention and Control (<https://www.ecdc.europa.eu/en>)

### GOVERNMENTS/HEALTH SYSTEMS

Canada (<https://www.canada.ca/en.html>)

- BC (<https://www2.gov.bc.ca/gov/content/home>)
- AB (<https://www.alberta.ca/index.aspx>)
- SK (<https://www.saskatchewan.ca>)
- MB (<https://www.gov.mb.ca>)
- ON (<https://www.ontario.ca/page/government>)
- QC (<https://www.quebec.ca/en/>)
- NB (<https://www2.gnb.ca>)
- NS (<https://beta.novascotia.ca>)
- NL & LB (<https://www.gov.nl.ca>)
- PEI (<https://www.princeedwardisland.ca/en>)
- Yukon (<https://yukon.ca>)
- NWT (<https://www.gov.nt.ca>)
- Nunavut (<https://www.gov.nu.ca>)

Australia (<https://www.australia.gov.au>)

Italy (<http://www.governo.it>)

Singapore (<https://www.gov.sg>)

China (<https://www.gov.cn/english/>)

USA (<https://www.usa.gov>)

### GENERAL SURGICAL GROUPS/COLLEGES

Royal College of Physicians and Surgeons of Canada (<http://www.royalcollege.ca>)  
 American College of Surgeons (<https://www.facs.org>)  
 European Surgical Association (<https://www.europeansurgicalassociation.org>)  
 College of Surgeons, Singapore (<https://www.ams.edu.sg/colleges/CSS/home>)  
 French Surgical Association  
 German Society of Surgery (<https://www.dgch.de/index.php?id=118>)  
 Italian Society of Surgery (SIC) and Italian Association of Hospital Surgeons (ACOI)  
 Philippine College of Surgeons (<https://www.pcs.org.ph>)  
 Royal Australasian College of Surgeons (<https://www.surgeons.org>)  
 Royal College of Surgeons of England (<https://www.rcseng.ac.uk>)  
 Royal College of Surgeons of Ireland (<https://www.rcsi.com/dublin/>)  
 Spanish Society of Surgery (Asociacion Espanola de Cirujanos) (<https://www.aecirujanos.es>)  
 Swedish Surgical Society (<http://www.svenskkirurgi.se>)  
 The Association of Surgeons of South Africa (<http://www.surgeon.co.za>)  
 The Pan African Association of Surgeons (<http://www.africansurgeons.com>)

STEP 2) Advanced Google Searching. Targeting above sites will assess 5 pages of Google Search past last click. Will be using standard and consistent terms “coronavirus” OR “Covid-19” OR “Surgery” OR “non-urgent” OR “guidelines”

STEP 3) General Search Engine (Google) Search with same terms as above, assessing 5 pages past last click for relevance.

STEP 4) Contact with Knowledge Experts.

| Source and Site                                                                                                                  | Search Terms                                                                                          | Potentially Relevant Results |
|----------------------------------------------------------------------------------------------------------------------------------|-------------------------------------------------------------------------------------------------------|------------------------------|
| <b>Health Groups</b>                                                                                                             |                                                                                                       |                              |
| World Health Organization ( <a href="https://www.who.int">https://www.who.int</a> , Advanced Search)                             | [contains all words]<br>elective surgery covid<br>[contains all words]<br>non-urgent surgery<br>covid | 10                           |
| Center for Disease Control and Prevention ( <a href="https://www.cdc.gov">https://www.cdc.gov</a> )                              | [contains all words]<br>elective surgery covid<br>[contains all words]<br>non-urgent surgery<br>covid | 8                            |
| European Centre for Disease Prevention and Control ( <a href="https://www.ecdc.europa.eu/en">https://www.ecdc.europa.eu/en</a> ) | [contains all words]<br>elective surgery covid<br>[contains all words]<br>non-urgent surgery<br>covid | 3                            |
| <b>Governments</b>                                                                                                               |                                                                                                       |                              |
| Government of Canada ( <a href="https://www.canada.ca/en.html">https://www.canada.ca/en.html</a> )                               | [contains all words]<br>elective surgery covid                                                        | 4                            |

|                                                                                                            |                                                                                                       |   |
|------------------------------------------------------------------------------------------------------------|-------------------------------------------------------------------------------------------------------|---|
|                                                                                                            | [contains all words]<br>non-urgent surgery<br>covid                                                   |   |
| Government of BC<br>( <a href="https://www2.gov.bc.ca/gov">https://www2.gov.bc.ca/gov</a> )                | [contains all words]<br>elective surgery covid<br>[contains all words]<br>non-urgent surgery<br>covid | 2 |
| Government of AB ( <a href="https://www.alberta.ca">https://www.alberta.ca</a> )                           | [contains all words]<br>elective surgery covid<br>[contains all words]<br>non-urgent surgery<br>covid | 2 |
| Government of SK<br>( <a href="https://www.saskatchewan.ca">https://www.saskatchewan.ca</a> )              | [contains all words]<br>elective surgery covid<br>[contains all words]<br>non-urgent surgery<br>covid | 6 |
| Government of MB ( <a href="https://www.gov.mb.ca">https://www.gov.mb.ca</a> )                             | [contains all words]<br>elective surgery covid<br>[contains all words]<br>non-urgent surgery<br>covid | 4 |
| Government of ON ( <a href="https://www.ontario.ca">https://www.ontario.ca</a> )                           | [contains all words]<br>elective surgery covid<br>[contains all words]<br>non-urgent surgery<br>covid | 1 |
| Government of QC<br>( <a href="https://www.quebec.ca/en/">https://www.quebec.ca/en/</a> )                  | [contains all words]<br>elective surgery covid<br>[contains all words]<br>non-urgent surgery<br>covid | 0 |
| Government of NB ( <a href="https://www2.gnb.ca">https://www2.gnb.ca</a> )                                 | [contains all words]<br>elective surgery covid<br>[contains all words]<br>non-urgent surgery<br>covid | 1 |
| Government of NS ( <a href="https://beta.novascotia.ca">https://beta.novascotia.ca</a> )                   | [contains all words]<br>elective surgery covid<br>[contains all words]<br>non-urgent surgery<br>covid | 1 |
| Government of NL & LB<br>( <a href="https://www.gov.nl.ca">https://www.gov.nl.ca</a> )                     | [contains all words]<br>elective surgery covid<br>[contains all words]<br>non-urgent surgery<br>covid | 1 |
| Government of PEI<br>( <a href="https://www.princeedwardisland.ca">https://www.princeedwardisland.ca</a> ) | [contains all words]<br>elective surgery covid                                                        | 2 |

|                                                                                                                               |                                                                                                       |   |
|-------------------------------------------------------------------------------------------------------------------------------|-------------------------------------------------------------------------------------------------------|---|
|                                                                                                                               | [contains all words]<br>non-urgent surgery<br>covid                                                   |   |
| Government of Yukon ( <a href="https://yukon.ca">https://yukon.ca</a> )                                                       | [contains all words]<br>elective surgery covid<br>[contains all words]<br>non-urgent surgery<br>covid | 1 |
| Government of NWT ( <a href="https://www.gov.nt.ca">https://www.gov.nt.ca</a> )                                               | [contains all words]<br>elective surgery covid<br>[contains all words]<br>non-urgent surgery<br>covid | 0 |
| Government of Nunavut<br>( <a href="https://www.gov.nu.ca">https://www.gov.nu.ca</a> )                                        | [contains all words]<br>elective surgery covid<br>[contains all words]<br>non-urgent surgery<br>covid | 0 |
| Government of Australia<br>( <a href="https://www.australia.gov.au">https://www.australia.gov.au</a> )                        | [contains all words]<br>elective surgery covid<br>[contains all words]<br>non-urgent surgery<br>covid | 0 |
| Government of Italy ( <a href="http://www.governo.it">http://www.governo.it</a> )                                             | [contains all words]<br>elective surgery covid<br>[contains all words]<br>non-urgent surgery<br>covid | 0 |
| Government of Singapore<br>( <a href="https://www.gov.sg">https://www.gov.sg</a> )                                            | [contains all words]<br>elective surgery covid<br>[contains all words]<br>non-urgent surgery<br>covid | 0 |
| Government of China<br>( <a href="https://www.gov.cn/english/">https://www.gov.cn/english/</a> )                              | [contains all words]<br>elective surgery covid<br>[contains all words]<br>non-urgent surgery<br>covid | 0 |
| United States Government<br>( <a href="https://www.usa.gov">https://www.usa.gov</a> )                                         | [contains all words]<br>elective surgery covid<br>[contains all words]<br>non-urgent surgery<br>covid | 0 |
| <b>Surgical Colleges/Associations</b>                                                                                         |                                                                                                       |   |
| Royal College of Physicians and Surgeons of<br>Canada ( <a href="http://www.royalcollege.ca">http://www.royalcollege.ca</a> ) | [contains all words]<br>elective surgery covid<br>[contains all words]<br>non-urgent surgery<br>covid | 0 |



|                                                                                                                                            |                                                                                                       |    |
|--------------------------------------------------------------------------------------------------------------------------------------------|-------------------------------------------------------------------------------------------------------|----|
| American College of Surgeons<br>( <a href="https://www.facs.org">https://www.facs.org</a> )                                                | [contains all words]<br>elective surgery covid<br>[contains all words]<br>non-urgent surgery<br>covid | 23 |
| European Surgical Association<br>( <a href="https://www.europeansurgicalassociation.org">https://www.europeansurgicalassociation.org</a> ) | [contains all words]<br>elective surgery covid<br>[contains all words]<br>non-urgent surgery<br>covid | 0  |
| College of Surgeons, Singapore<br>( <a href="https://www.ams.edu.sg">https://www.ams.edu.sg</a> )                                          | [contains all words]<br>elective surgery covid<br>[contains all words]<br>non-urgent surgery<br>covid | 3  |
| German Society of Surgery<br>( <a href="https://www.dgch.de/index.php?id=118">https://www.dgch.de/index.php?id=118</a> )                   | [contains all words]<br>elective surgery covid<br>[contains all words]<br>non-urgent surgery<br>covid | 0  |
| Philippine College of Surgeons<br>( <a href="https://www.pcs.org.ph">https://www.pcs.org.ph</a> )                                          | [contains all words]<br>elective surgery covid<br>[contains all words]<br>non-urgent surgery<br>covid | 11 |
| Royal Australasian College of Surgeons<br>( <a href="https://www.surgeons.org">https://www.surgeons.org</a> )                              | [contains all words]<br>elective surgery covid<br>[contains all words]<br>non-urgent surgery<br>covid | 12 |
| Royal College of Surgeons of England<br>( <a href="https://www.rcseng.ac.uk">https://www.rcseng.ac.uk</a> )                                | [contains all words]<br>elective surgery covid<br>[contains all words]<br>non-urgent surgery<br>covid | 7  |
| Royal College of Surgeons of Ireland<br>( <a href="https://www.rcsi.com/dublin/">https://www.rcsi.com/dublin/</a> )                        | [contains all words]<br>elective surgery covid<br>[contains all words]<br>non-urgent surgery<br>covid | 8  |
| Spanish Society of Surgery (Asociacion Espanola de Cirujanos)<br>( <a href="https://www.aecirujanos.es">https://www.aecirujanos.es</a> )   | [contains all words]<br>elective surgery covid<br>[contains all words]<br>non-urgent surgery<br>covid | 1  |
| Swedish Surgical Society<br>( <a href="http://www.svenskkirurgi.se">http://www.svenskkirurgi.se</a> )                                      | [contains all words]<br>elective surgery covid<br>[contains all words]<br>non-urgent surgery<br>covid | 0  |

|                                                                                                                            |                                                                                                       |     |
|----------------------------------------------------------------------------------------------------------------------------|-------------------------------------------------------------------------------------------------------|-----|
| The Association of Surgeons of South Africa<br>( <a href="http://www.surgeon.co.za">http://www.surgeon.co.za</a> )         | [contains all words]<br>elective surgery covid<br>[contains all words]<br>non-urgent surgery<br>covid | 0   |
| The Pan African Association of Surgeons<br>( <a href="http://www.africansurgeons.com">http://www.africansurgeons.com</a> ) | [contains all words]<br>elective surgery covid<br>[contains all words]<br>non-urgent surgery<br>covid | 0   |
| Total                                                                                                                      |                                                                                                       | 111 |
